# Supplementary material for: Lanthanide complexes facilitate wound healing by promoting fibroblast viability, migration and M2 macrophage polarization
Source: Royal Society of Chemistry journal article supplement (doi:10.1039/d3dt02662k), 2023-11-07
Supplement: d3dt02662k1.pdf [file d3dt02662k1.pdf]

## Supporting Information

### **Lanthanide Complexes Efficacy in Promoting Fibroblast Migration and M2 Macrophage Polarization to Facilitate Wound Healing**

Wajid Ali,<sup>a</sup> Fatemeh Jamshidi-Adegani<sup>b</sup>, Zahra Mirsanei,<sup>b,c</sup> Juhaina Al-Kindi<sup>b</sup>, Saeid Vakilian<sup>b</sup>, Sulaiman Al-Hashmi<sup>b</sup>, Mohammed Al-Broumi,<sup>a</sup> Jeremy M. Rawson,<sup>d</sup> Ahmed Al-Harrasi,<sup>a\*</sup> M. Usman Anwar<sup>a\*</sup>

<sup>a</sup>*Natural and Medical Sciences Research Centre, University of Nizwa, P O Box 33, PC 616, Birkat Almouz, Nizwa, Oman. E-mail: usman.anwar@unizwa.edu.om*

<sup>b</sup>Laboratory for Stem Cell & Regenerative Medicine, Natural and Medical Sciences Research Center, University of Nizwa, Nizwa, P. O. Box: 33, PC 616, Oman

<sup>c</sup>Department of Immunology, School of Medicine, Shahid Beheshti University of Medical Sciences, Tehran, Iran

<sup>d</sup>Department of Chemistry and Biochemistry, University of Windsor, 401 Sunset Ave, Windsor, ON, N9B3P4, Canada.

## Contents

|                                                                                                                                                                                                                                                               |   |
|---------------------------------------------------------------------------------------------------------------------------------------------------------------------------------------------------------------------------------------------------------------|---|
| Table S 1: Crystal data for <b>1, 2, 4, 6 and 7</b> . .....                                                                                                                                                                                                   | 3 |
| Table S 2: UV-Vis data for ligand (LH3) and complexes 1 – 7. ....                                                                                                                                                                                             | 4 |
| Figure S 2: UV-Vis solution spectra of complex <b>1 – 7</b> and free ligand <b>LH<sub>3</sub></b> (DMF, rt, concentration 10 <sup>-5</sup> –10 <sup>-6</sup> M). .....                                                                                        | 4 |
| Figure S 1: <sup>1</sup> H NMR of complex ligand <b>LH<sub>3</sub></b> (top) and complex <b>2</b> (Eu) in DMSO- <i>d</i> <sub>6</sub> .....                                                                                                                   | 5 |
| Figure S 3 Variable concentration UV-Vis studies of complex <b>2</b> (Eu).....                                                                                                                                                                                | 6 |
| Figure S 4: HPLC chromatogram of <b>2 (Eu)</b> incubated in DMSO for 0 – 72 hours. ....                                                                                                                                                                       | 6 |
| Figure S 5: Mass spectrum (ESI <sup>+</sup> ) for <b>2(Eu)</b> (black) revealing the complexity of isotopomers. The blue lines represent the sum of the six molecular ions labelled, as a marker for where the distributions of isotopomers are expected..... | 7 |
| Figure S 6: Molecular structure of <b>Sm<sub>4</sub>(C<sub>11</sub>H<sub>11</sub>N<sub>3</sub>O<sub>4</sub>)<sub>6</sub>(CH<sub>3</sub>OH)<sub>2</sub> (<b>1</b>)</b> . Color codes: Grey = Carbon; blue = Nitrogen; Red = oxygen. ....                       | 8 |
| Figure S 7: Molecular structure of <b>Tb<sub>4</sub>(C<sub>11</sub>H<sub>11</sub>N<sub>3</sub>O<sub>4</sub>)<sub>6</sub>(CH<sub>3</sub>OH)<sub>2</sub> (<b>4</b>)</b> . Color codes: Grey = Carbon; blue = Nitrogen; Red = oxygen. ....                       | 8 |
| Figure S 8: Molecular structure of <b>Ho<sub>4</sub>(C<sub>11</sub>H<sub>11</sub>N<sub>3</sub>O<sub>4</sub>)<sub>6</sub>(CH<sub>3</sub>OH)<sub>2</sub> (<b>6</b>)</b> . Color codes: Grey = Carbon; blue = Nitrogen; Red = oxygen. ....                       | 9 |
| Figure S 9: Molecular structure of <b>Er<sub>4</sub>(C<sub>11</sub>H<sub>11</sub>N<sub>3</sub>O<sub>4</sub>)<sub>6</sub>(CH<sub>3</sub>OH)<sub>2</sub> (<b>7</b>)</b> . Color codes: Grey = Carbon; blue = Nitrogen; Red = oxygen. ....                       | 9 |

Table S 1: Crystal data for **1, 2, 4, 6 and 7**.

| Compounds                                                                   | LH <sub>3</sub>                                               | 1                                                                               | 2                                                                               | 4                                                                               | 6                                                                               | 7                                                                               |
|-----------------------------------------------------------------------------|---------------------------------------------------------------|---------------------------------------------------------------------------------|---------------------------------------------------------------------------------|---------------------------------------------------------------------------------|---------------------------------------------------------------------------------|---------------------------------------------------------------------------------|
| <b>Chemical formula</b>                                                     | C <sub>11</sub> H <sub>13</sub> N <sub>3</sub> O <sub>4</sub> | Sm <sub>4</sub> C <sub>68</sub> H <sub>74</sub> N <sub>18</sub> O <sub>26</sub> | Eu <sub>4</sub> C <sub>68</sub> H <sub>74</sub> N <sub>18</sub> O <sub>26</sub> | Tb <sub>4</sub> C <sub>68</sub> H <sub>74</sub> N <sub>18</sub> O <sub>26</sub> | Ho <sub>4</sub> C <sub>68</sub> H <sub>74</sub> N <sub>18</sub> O <sub>26</sub> | Er <sub>4</sub> C <sub>68</sub> H <sub>74</sub> N <sub>18</sub> O <sub>26</sub> |
| <b>Mr</b>                                                                   | 251.24                                                        | 2160.85                                                                         | 2165.27                                                                         | 2195.13                                                                         | 2219.17                                                                         | 2228.49                                                                         |
| <b>Crystal system, space group</b>                                          | Monoclinic, P2 <sub>1</sub> /n                                | Triclinic, P-1                                                                  |
| <b>Temperature (K)</b>                                                      | 296                                                           | 173                                                                             | 150                                                                             | 173                                                                             | 150                                                                             | 170                                                                             |
| <b>a(Å)</b>                                                                 | 9.7938(5)                                                     | 11.393(2)                                                                       | 11.3839(4)                                                                      | 11.4008(14)                                                                     | 11.3425(5)                                                                      | 11.3514(4),                                                                     |
| <b>b(Å)</b>                                                                 | 11.0121(7)                                                    | 12.080(2)                                                                       | 12.0588(6)                                                                      | 12.1141(15)                                                                     | 12.0765(6)                                                                      | 12.0481(5)                                                                      |
| <b>c(Å)</b>                                                                 | 11.4745(7)                                                    | 14.473(3)                                                                       | 14.4588(7)                                                                      | 14.3980(18)                                                                     | 14.3119(7)                                                                      | 14.3157(5)                                                                      |
| <b>α (°)</b>                                                                | 90                                                            | 85.37(3)                                                                        | 85.417(2)                                                                       | 85.328(4)                                                                       | 85.430(2)                                                                       | 85.452(2)                                                                       |
| <b>β (°)</b>                                                                | 104.533(2)                                                    | 75.48(3)                                                                        | 75.454(2)                                                                       | 75.080(4)                                                                       | 74.914(2)                                                                       | 75.0480(10)                                                                     |
| <b>γ (°)</b>                                                                | 90                                                            | 74.49(3)                                                                        | 74.695(2)                                                                       | 75.079(4)                                                                       | 75.428(2)                                                                       | 75.516(2)                                                                       |
| <b>V (Å<sup>3</sup>)</b>                                                    | 1197.93(12)                                                   | 1857.9(7)                                                                       | 1852.89(15)                                                                     | 1856.4(4)                                                                       | 1831.75(15)                                                                     | 1831.22(12)                                                                     |
| <b>Z</b>                                                                    | 2                                                             | 1                                                                               | 1                                                                               | 1                                                                               | 1                                                                               | 1                                                                               |
| <b>μ (mm<sup>-1</sup>)</b>                                                  | 0.108                                                         | 3.209                                                                           | 3.434                                                                           | 19.175                                                                          | 4.369                                                                           | 4.632                                                                           |
| <b>Radiation type</b>                                                       | MoK <sub>α</sub>                                              | MoK <sub>α</sub>                                                                | MoK <sub>α</sub>                                                                | CuK <sub>α</sub>                                                                | MoK <sub>α</sub>                                                                | MoK <sub>α</sub>                                                                |
| <b>Absorption correction</b>                                                | Multi-scan, SADABS                                            | Multi-scan, SADABS                                                              | Multi-scan, SADABS                                                              | Multi-scan, SADABS                                                              | Multi-scan, SADABS                                                              | Multi-scan, SADABS                                                              |
| <b>T<sub>min</sub>, T<sub>max</sub></b>                                     | 0.7051, 0.7454                                                | 0.66, 0.91                                                                      | 0.6209, 0.7451                                                                  | 0.434, 0.748                                                                    | 0.5722, 0.754                                                                   | 0.5803, 0.7454                                                                  |
| <b>No. of measured, independent and observed [I &gt; 2σ(I)] reflections</b> | 42527, 2456, 2109                                             | 30373, 6539, 4942                                                               | 48079, 6305, 5157                                                               | 9002, 2225, 1886                                                                | 81415, 7475, 5931                                                               | 34280, 6269, 5079                                                               |
| <b>R<sub>int</sub></b>                                                      | 0.0250                                                        | 0.0722                                                                          | 0.0418                                                                          | 0.0587                                                                          | 0.0636                                                                          | 0.0481                                                                          |
| <b>(sin θ/λ)<sub>max</sub> (Å<sup>-1</sup>)</b>                             | 0.626                                                         | 0.595                                                                           | 0.588                                                                           | 0.421                                                                           | 0.625                                                                           | 0.589                                                                           |
| <b>R[F<sup>2</sup> &gt; 2σ(F<sup>2</sup>)], wR(F<sup>2</sup>), S</b>        | 0.0409, 0.1109, 1.032                                         | 0.0470, 0.1261, 1.088                                                           | 0.0610, 0.1955, 0.956                                                           | 0.0444, 0.1023, 1.069                                                           | 0.0372, 0.1181, 1.067                                                           | 0.0367, 0.1069, 1.029                                                           |
| <b>No. of reflections</b>                                                   | 2456                                                          | 6539                                                                            | 6305                                                                            | 2225                                                                            | 7475                                                                            | 6269                                                                            |
| <b>No. of parameters</b>                                                    | 175                                                           | 536                                                                             | 539                                                                             | 536                                                                             | 536                                                                             | 542                                                                             |
| <b>No. of restraints</b>                                                    | 3                                                             | 567                                                                             | 550                                                                             | 519                                                                             | 1                                                                               | 4                                                                               |
| <b>Δρ<sub>max</sub>, Δρ<sub>min</sub> (eÅ<sup>-3</sup>)</b>                 | 0.250, -0.165                                                 | 3.327, -1.360                                                                   | 4.787, -2.758                                                                   | 0.514, -0.435                                                                   | 4.232, -1.487                                                                   | 5.788, -1.340                                                                   |
| <b>CCDC</b>                                                                 | 2285807                                                       | 2285808                                                                         | 2285809                                                                         | 2285810                                                                         | 2285811                                                                         | 2285812                                                                         |

Table S 2: UV-Vis data for ligand (LH3) and complexes 1 – 7.

| Compounds              | Wavenumbers ( $\epsilon$ )         | Wavenumbers (nm), $\epsilon$ ( $M^{-1} cm^{-1}$ ) |
|------------------------|------------------------------------|---------------------------------------------------|
| Ligand LH <sub>3</sub> | 300 nm ( $9120 M^{-1} cm^{-1}$ )   | -                                                 |
| Complex 1              | 311 nm ( $144000 M^{-1} cm^{-1}$ ) | 388 nm ( $54400 M^{-1} cm^{-1}$ )                 |
| Complex 2              | 312 nm ( $113400 M^{-1} cm^{-1}$ ) | 381 nm ( $37700 M^{-1} cm^{-1}$ )                 |
| Complex 3              | 312 nm ( $146500 M^{-1} cm^{-1}$ ) | 388 nm ( $56300 M^{-1} cm^{-1}$ )                 |
| Complex 4              | 313 nm ( $125500 M^{-1} cm^{-1}$ ) | 384 nm ( $44000 M^{-1} cm^{-1}$ )                 |
| Complex 5              | 313 nm ( $94300 M^{-1} cm^{-1}$ )  | 388 nm ( $35400 M^{-1} cm^{-1}$ )                 |
| Complex 6              | 313 nm ( $92900 M^{-1} cm^{-1}$ )  | 383 nm ( $35900 M^{-1} cm^{-1}$ )                 |
| Complex 7              | 313 nm ( $71300 M^{-1} cm^{-1}$ )  | 385 nm ( $30100 M^{-1} cm^{-1}$ )                 |

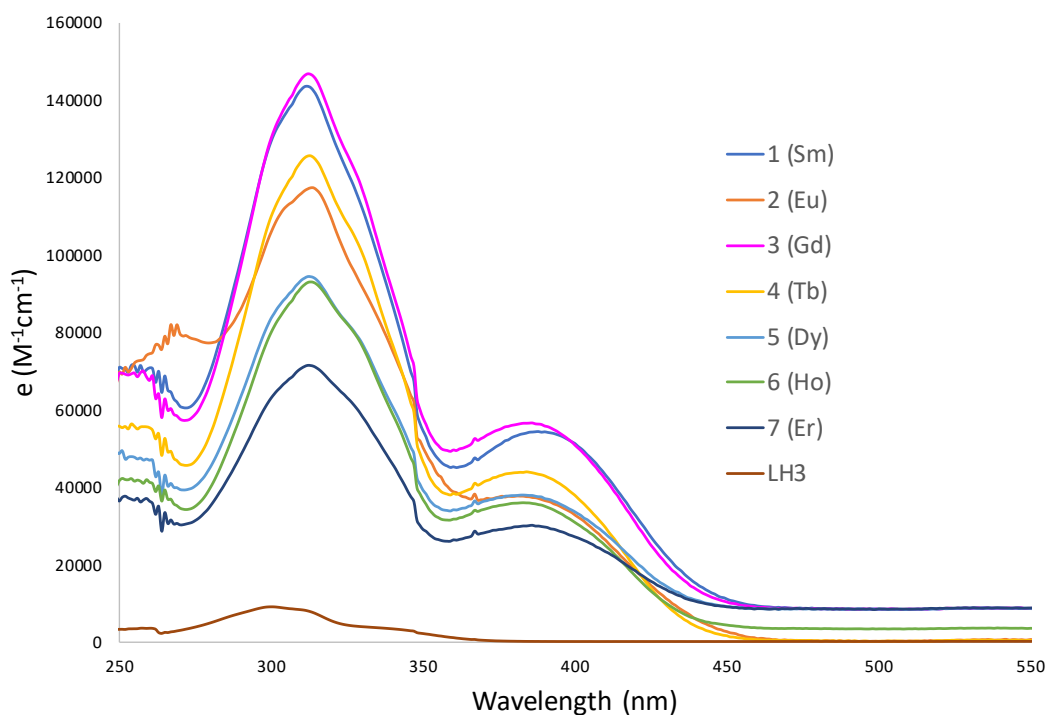

Figure S 1: UV-Vis solution spectra of complex 1 – 7 and free ligand LH<sub>3</sub> (DMF, rt, concentration  $10^{-5}$  –  $10^{-6}$  M).

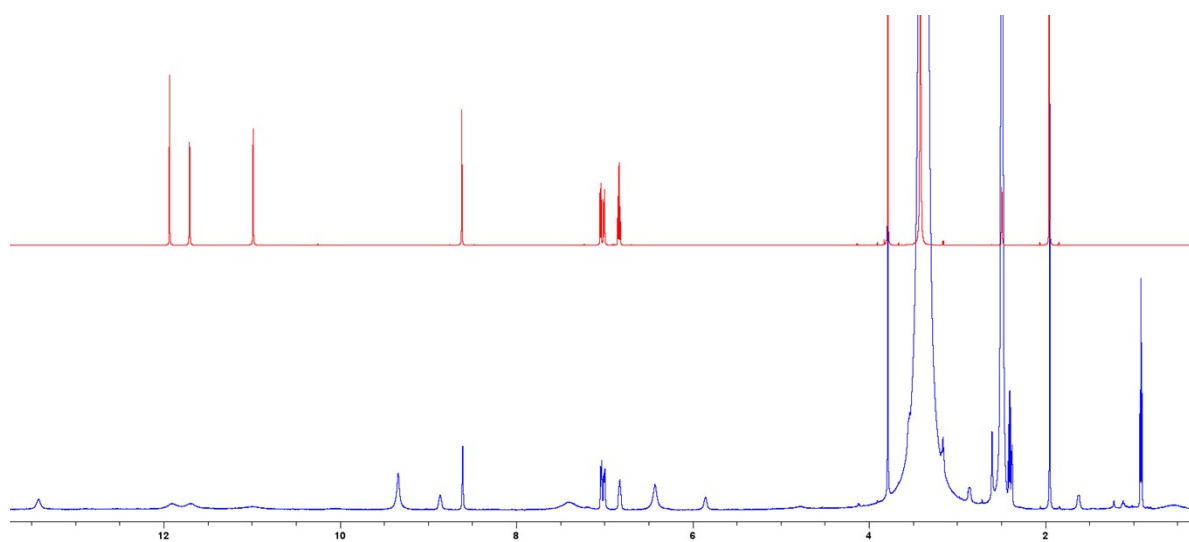

Figure S 2: <sup>1</sup>H NMR of ligand **LH<sub>3</sub>** (top) and complex **2(Eu)** in DMSO-*d*<sub>6</sub>

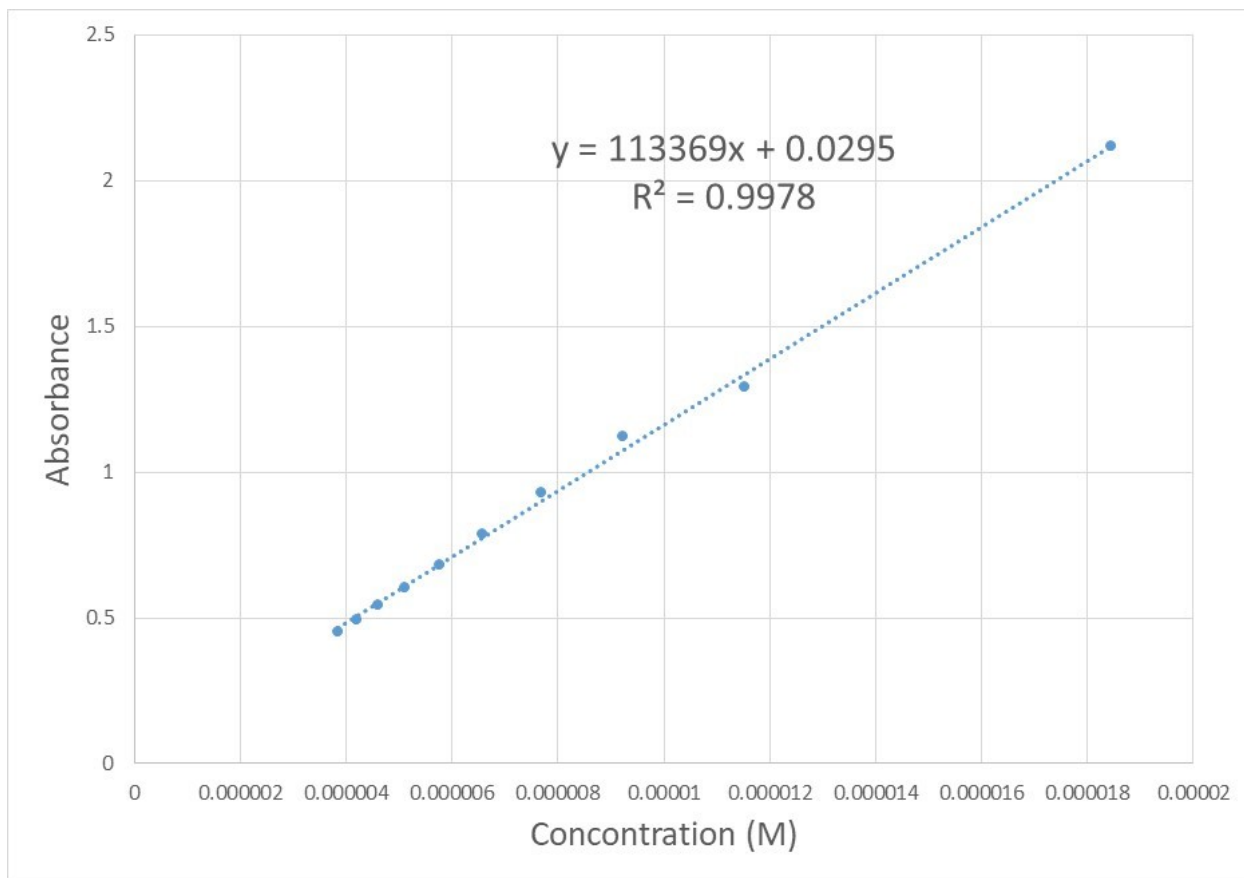

Figure S 3 Variable concentration UV-Vis studies of complex **2** (Eu).

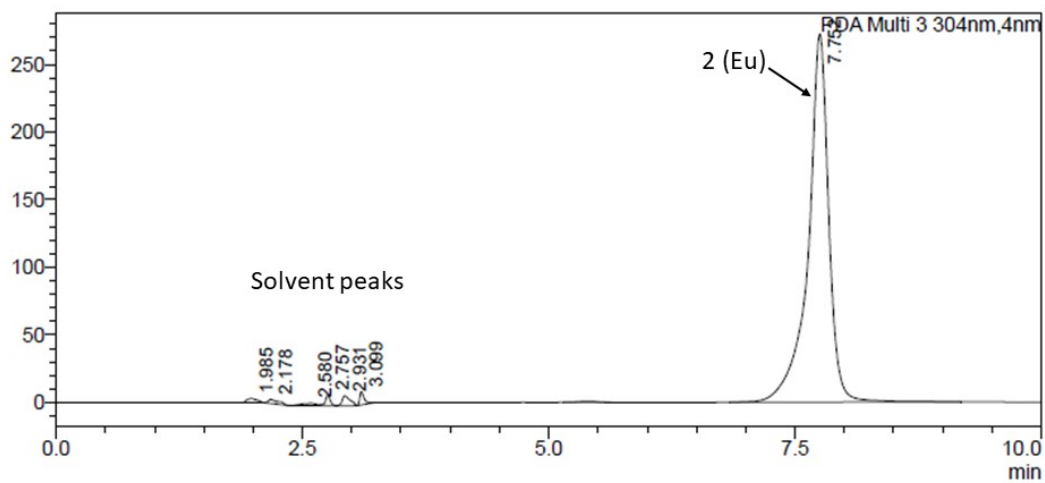

Figure S 4: HPLC chromatogram of **2** (Eu) incubated in DMSO for 0 – 72 hours.

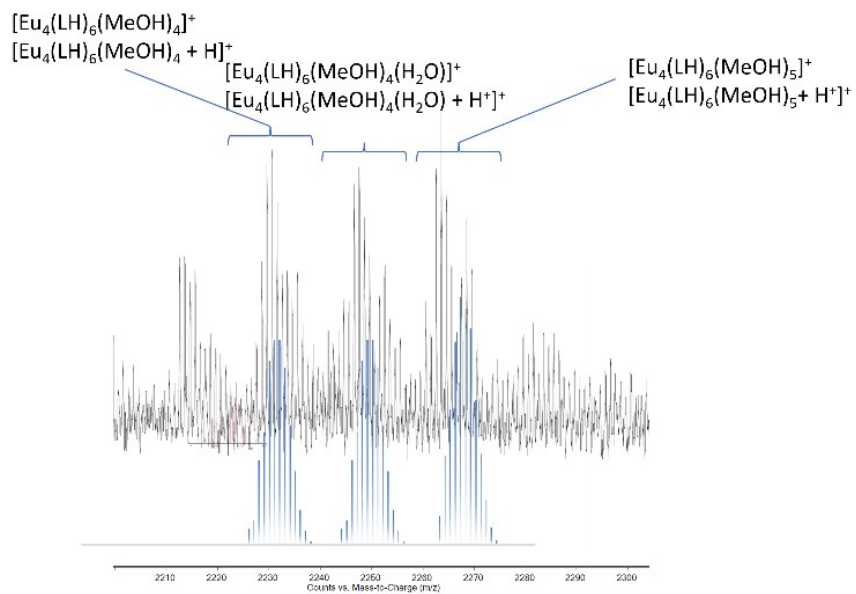

Figure S 5: Mass spectrum (ESI<sup>+</sup>) for **2(Eu)** (black) revealing the complexity of isotopomers. The blue lines represent the sum of the six molecular ions labelled, as a marker for where the distributions of isotopomers are expected.

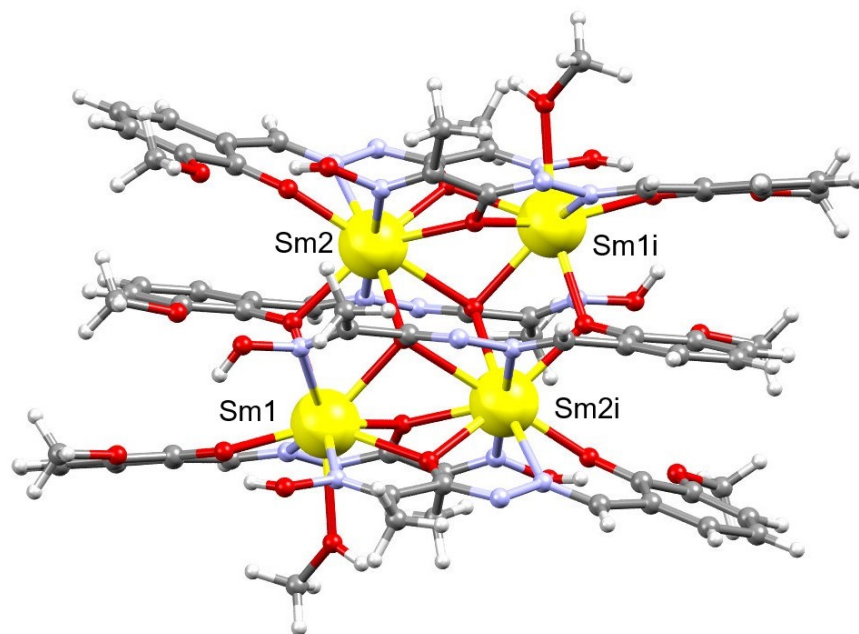

Figure S 6: Molecular structure of  $\text{Sm}_4(\text{C}_{11}\text{H}_{11}\text{N}_3\text{O}_4)_6(\text{CH}_3\text{OH})_2$  (**1**). Color codes: Grey = Carbon; blue = Nitrogen; Red = oxygen.

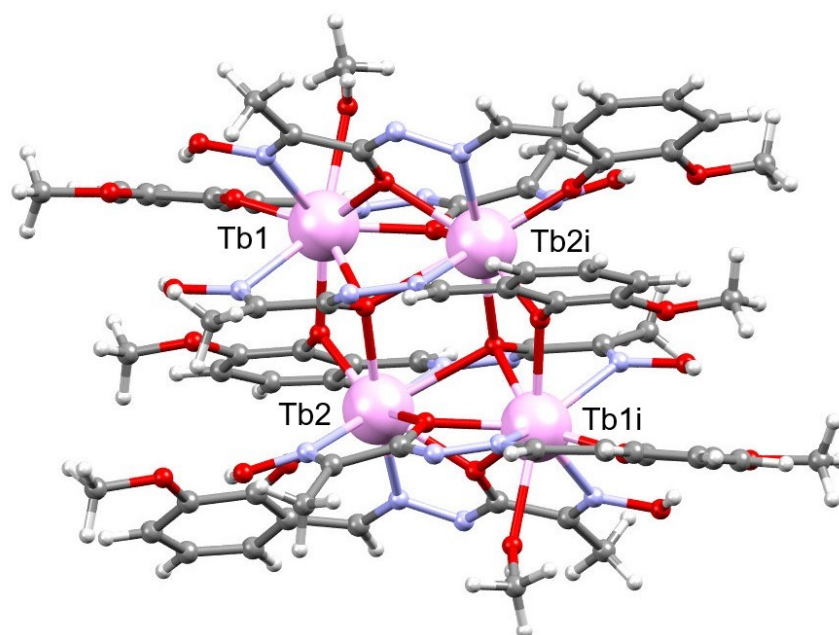

Figure S 7: Molecular structure of  $\text{Tb}_4(\text{C}_{11}\text{H}_{11}\text{N}_3\text{O}_4)_6(\text{CH}_3\text{OH})_2$  (**4**). Color codes: Grey = Carbon; blue = Nitrogen; Red = oxygen.



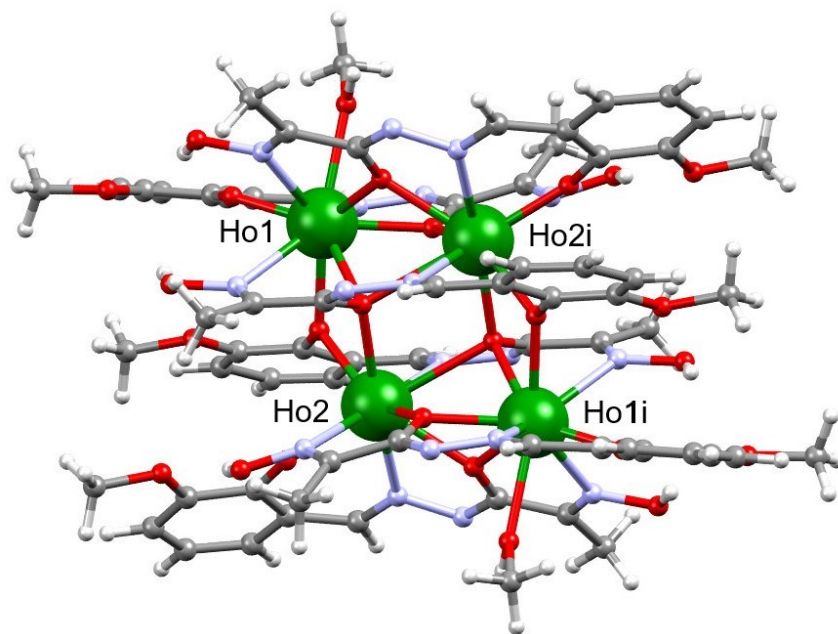

Figure S 8: Molecular structure of  $\text{Ho}_4(\text{C}_{11}\text{H}_{11}\text{N}_3\text{O}_4)_6(\text{CH}_3\text{OH})_2$  (**6**). Color codes: Grey = Carbon; blue = Nitrogen; Red = oxygen.

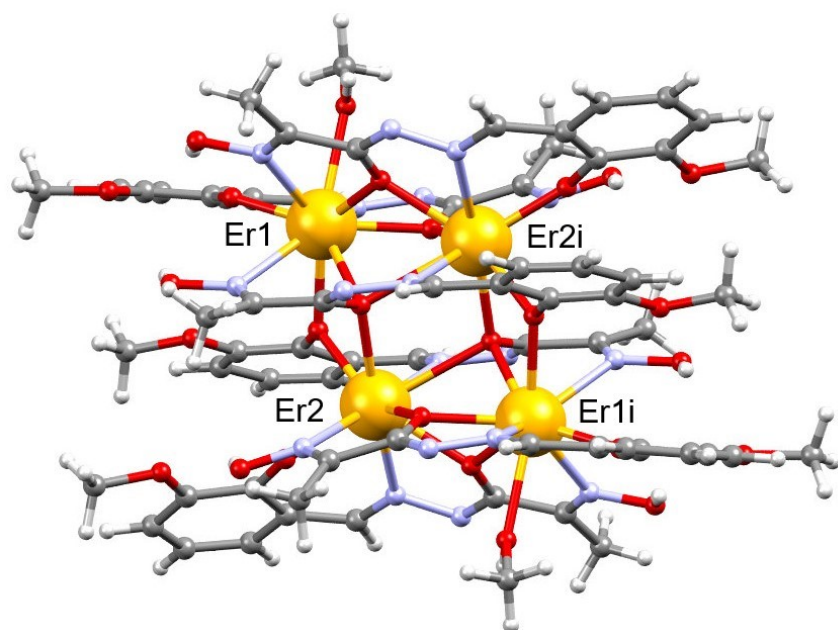

Figure S 9: Molecular structure of  $\text{Er}_4(\text{C}_{11}\text{H}_{11}\text{N}_3\text{O}_4)_6(\text{CH}_3\text{OH})_2$  (**7**). Color codes: Grey = Carbon; blue = Nitrogen; Red = oxygen.
